# Supplementary material for: The transcription factor TCFL5 responds to A-MYB to elaborate the male meiotic program in mice
Source: PubMed Central journal article supplement (PMC9812935; doi:10.1530/rep-22-0355), 2023-01-04

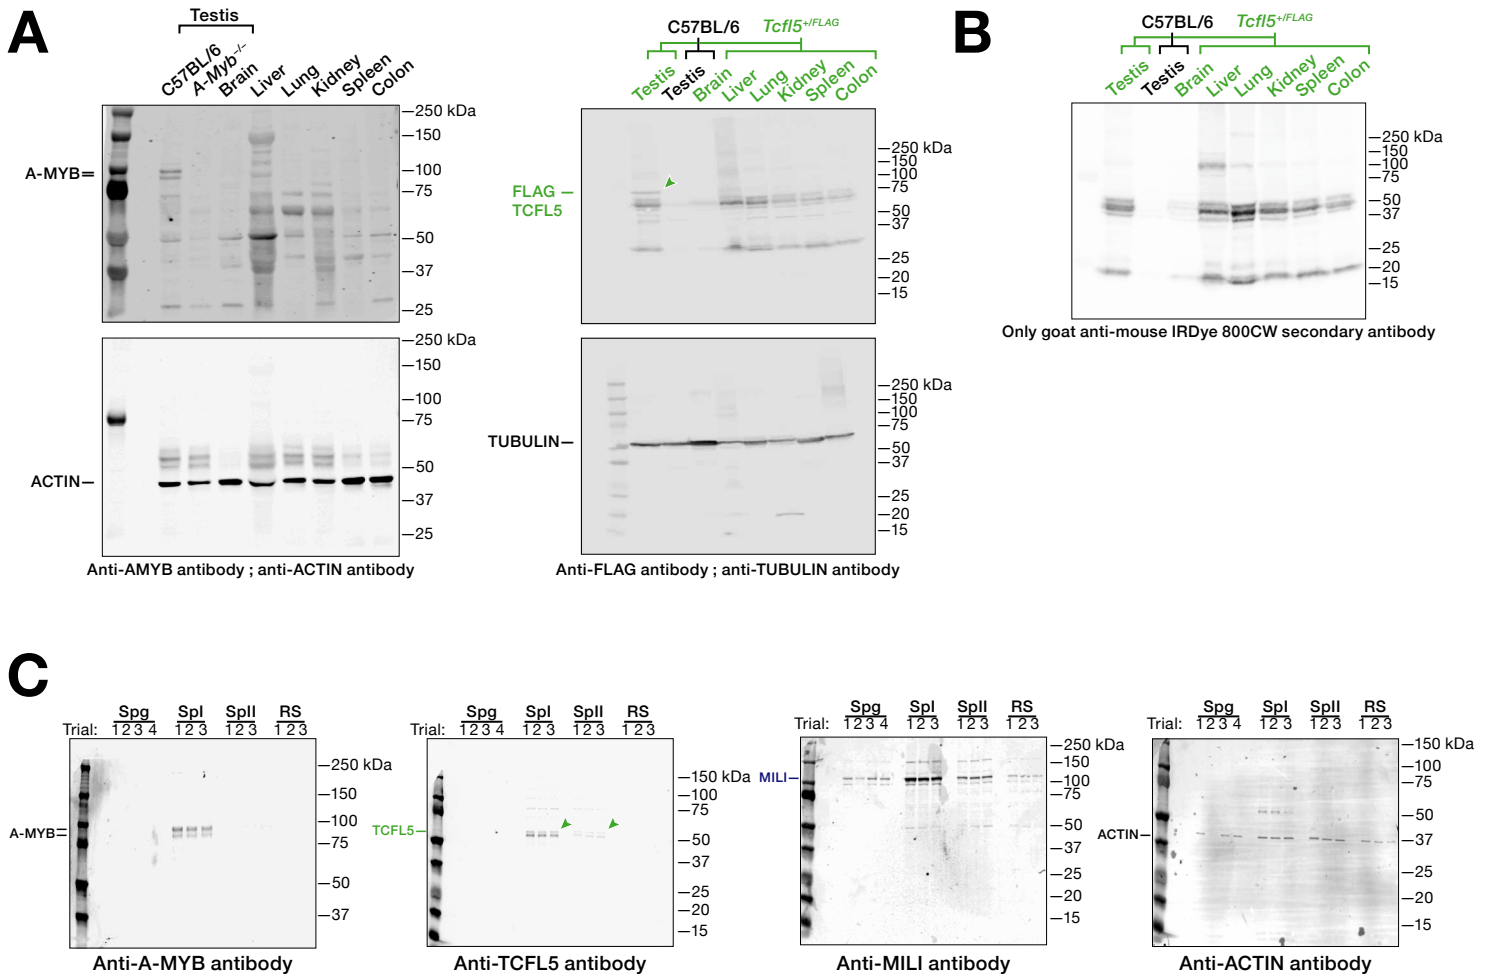

Supplement: NIHMS1854436-supplement-02.pdf [file NIHMS1854436-supplement-02.pdf]
