# Supplementary material for: The transcription factor TCFL5 responds to A-MYB to elaborate the male meiotic program in mice
Source: PubMed Central journal article supplement (PMC9812935; doi:10.1530/rep-22-0355), 2023-01-04
Supplement: NIHMS1854436-supplement-03.pdf [file NIHMS1854436-supplement-03.pdf]

**A** TUNEL staining, hematoxylin

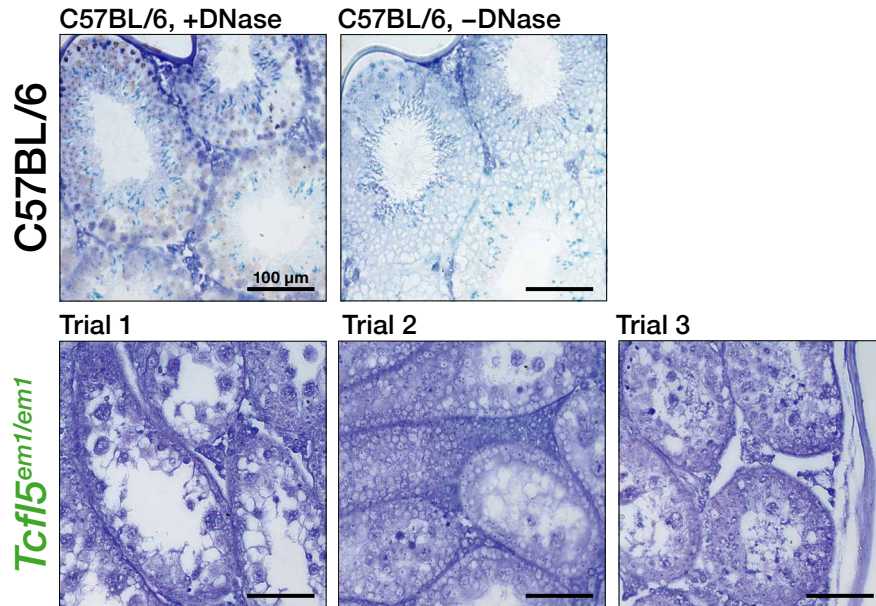

**B**

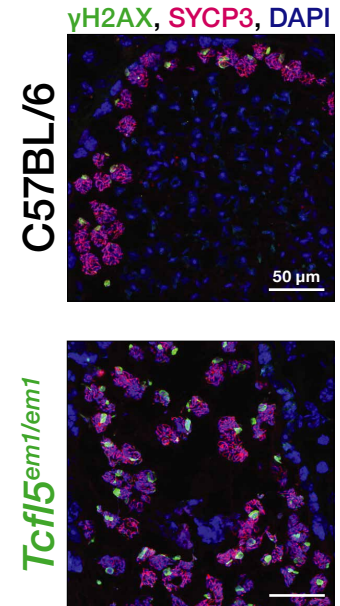

**C**

$\gamma$ H2AX, SYCP3, DAPI

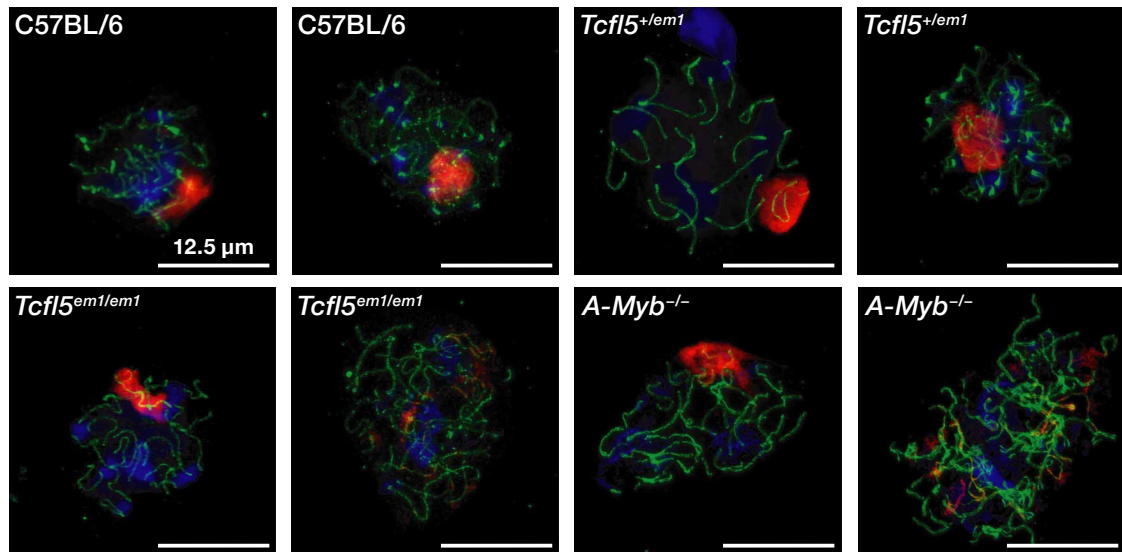

**D**

|                                | Cells with $\gamma$ H2AX on sex body only | Cells with $\gamma$ H2AX on both autosomes and sex body | Cells with $\gamma$ H2AX but no sex body | N   |
|--------------------------------|-------------------------------------------|---------------------------------------------------------|------------------------------------------|-----|
| C57BL/6                        | 132 (97%)                                 | 4 (3%)                                                  | 0                                        | 136 |
| <i>Tcf15<sup>+/em1</sup></i>   | 102 (85%)                                 | 13 (11%)                                                | 5 (4%)                                   | 120 |
| <i>Tcf15<sup>em1/em1</sup></i> | 65 (59%)                                  | 41 (37%)                                                | 4 (4%)                                   | 110 |
| <i>A-Myb<sup>-/-</sup></i>     | 73 (60%)                                  | 32 (26%)                                                | 17 (14%)                                 | 122 |
