# Supplementary material for: The transcription factor TCFL5 responds to A-MYB to elaborate the male meiotic program in mice
Source: PubMed Central journal article supplement (PMC9812935; doi:10.1530/rep-22-0355), 2023-01-04
Supplement: NIHMS1854436-supplement-05.pdf [file NIHMS1854436-supplement-05.pdf]

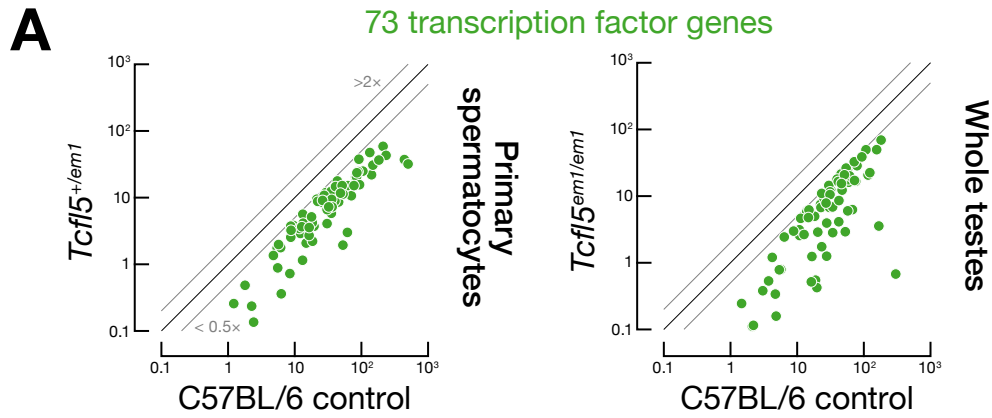

**B**

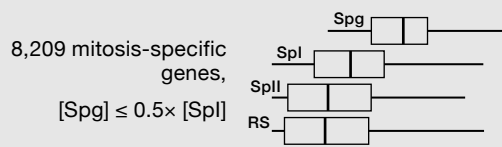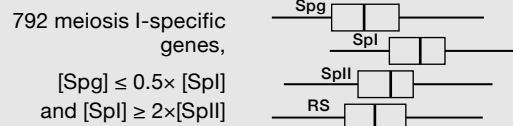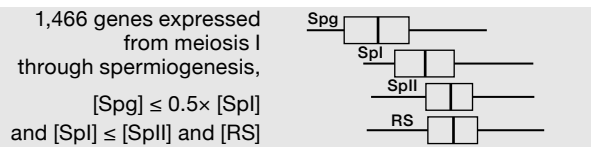

0.1 1 10 10<sup>2</sup> 10<sup>3</sup> 10<sup>4</sup>

Concentration  
(transcripts per cell volume)

**C**

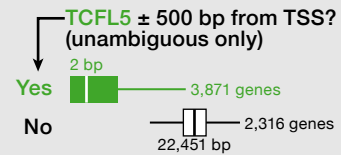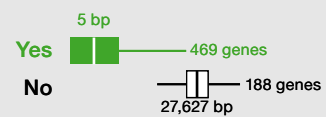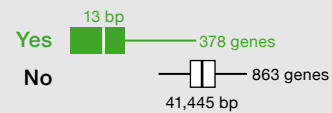

1 10 10<sup>2</sup> 10<sup>3</sup> 10<sup>4</sup> 10<sup>5</sup> 10<sup>6</sup> 10<sup>7</sup>

Distance from TSS  
to nearest TCFL5 peak (bp)
